# Supplementary material for: Structure and property exploration of two-dimensional, bulk, and cluster lithium sulfide using the IM2ODE method
Source: Royal Society of Chemistry journal article supplement (doi:10.1039/d4cp03587a), 2024-11-29
Supplement: d4cp03587a1.pdf [file d4cp03587a1.pdf]

## **Electronic Supplementary Information**

### **Structure and property exploration of two-dimensional, bulk, and cluster lithium sulfide using IM<sup>2</sup>ODE method**

Danling Wang<sup>1+</sup>, Chenqi Bai<sup>1+</sup>, Jian Cao<sup>1</sup>, Yu Wang<sup>1</sup>, Zian Chen, Lei Wang<sup>1</sup>, Lina Xu<sup>1\*</sup>, Hongping Xiao<sup>1</sup>, Yueyu Zhang<sup>2\*</sup>, Guoyong Fang<sup>1\*</sup>

<sup>1</sup>Zhejiang Provincial Key Laboratory of Carbon Materials, College of Chemistry and Materials Engineering, Wenzhou University, Wenzhou 325035, China

<sup>2</sup>Wenzhou Institute, University of Chinese Academy of Sciences, Wenzhou 325001, China

<sup>+</sup>Both authors contributed equally.

\*E-mail: xulina@wzu.edu.cn, zhangyy@wiucas.ac.cn, fanggy@wzu.edu.cn

#### **S1. Atomic Coordinates of 2D Li<sub>2</sub>S**

#### **S2. Atomic Coordinates of 3D Li<sub>2</sub>S**

#### **S3. Atomic Coordinates of (Li<sub>2</sub>S)<sub>n</sub> clusters**

## S1. Atomic Coordinates of 2D Li<sub>2</sub>S

### Double-layer hexagonal structure

1.0000000000000000

|                     |                    |                     |
|---------------------|--------------------|---------------------|
| 3.9735300540999998  | 0.0000000000000000 | 0.0000000000000000  |
| -1.9867650269999999 | 3.4411779695000000 | 0.0000000000000000  |
| 0.0000000000000000  | 0.0000000000000000 | 24.2642822265999989 |

Li S

4 2

Direct

|                    |                    |                    |
|--------------------|--------------------|--------------------|
| 0.6666666870000029 | 0.3333333429999996 | 0.5322997122371408 |
| 0.3333333429999996 | 0.6666666870000029 | 0.4677002877628592 |
| 0.0000000000000000 | 0.0000000000000000 | 0.5954738478677918 |
| 0.0000000000000000 | 0.0000000000000000 | 0.4045261821322036 |
| 0.3333333429999996 | 0.6666666870000029 | 0.5685870039829538 |
| 0.6666666870000029 | 0.3333333429999996 | 0.4314129670170472 |

### Single-layer hexagonal structure

1.0000000000000000

|                     |                    |                     |
|---------------------|--------------------|---------------------|
| 3.9316999911999999  | 0.0000000000000000 | 0.0000000000000000  |
| -1.9658499956000000 | 3.4049520725000000 | 0.0000000000000000  |
| 0.0000000000000000  | 0.0000000000000000 | 11.9525995255000002 |

Li S

2 1

Direct

|                    |                    |                    |
|--------------------|--------------------|--------------------|
| 0.3333333730000021 | 0.6666666870000029 | 0.5609500409999981 |
| 0.6666666269999979 | 0.3333333129999971 | 0.4390499889999973 |
| 0.0000000000000000 | 0.0000000000000000 | 0.5000000000000000 |

## S2. Atomic Coordinates of 3D Li<sub>2</sub>S

### Fm $\bar{3}$ m- Li<sub>2</sub>S

1.0000000000000000

|                    |                    |                     |
|--------------------|--------------------|---------------------|
| 5.7147959999999998 | 0.0000000000000000 | 0.0000000000000000  |
| 0.0000000000000000 | 5.7176049999999998 | -0.0000040000000000 |
| 0.0000000000000000 | 0.0000000000000000 | 5.7160299999999999  |

Li S

8 4

Direct

|                    |                    |                    |
|--------------------|--------------------|--------------------|
| 0.2500229999999998 | 0.7500420000000005 | 0.2500110000000006 |
| 0.7500229999999998 | 0.7499559999999974 | 0.7500130000000027 |
| 0.7500229999999998 | 0.2499570000000020 | 0.7499869999999973 |
| 0.2500229999999998 | 0.2500410000000031 | 0.2499880000000019 |
| 0.7499770000000012 | 0.2500410000000031 | 0.2499880000000019 |
| 0.2499770000000012 | 0.2499570000000020 | 0.7499869999999973 |
| 0.2499770000000012 | 0.7499559999999974 | 0.7500130000000027 |
| 0.7499770000000012 | 0.7500420000000005 | 0.2500110000000006 |
| 0.0000000000000000 | 0.9999960000000030 | 0.9996420000000015 |
| 0.0000000000000000 | 0.4999979999999979 | 0.5003590000000031 |
| 0.5000000000000000 | 0.5000080000000011 | 0.0003590000000031 |
| 0.5000000000000000 | 0.0000059999999991 | 0.4996399999999994 |

### Pnma- Li<sub>2</sub>S

1.0000000000000000

|                    |                    |                    |
|--------------------|--------------------|--------------------|
| 6.2965748469063945 | 0.0000000000000000 | 0.0000000000000000 |
| 0.0000000000000000 | 3.8108583105460978 | 0.0000000000000000 |
| 0.0000000000000000 | 0.0000000000000000 | 7.2353406189558891 |

Li S

8 4

Direct

|                    |                    |                    |
|--------------------|--------------------|--------------------|
| 0.4788890643672981 | 0.2500000000000000 | 0.6654249923633647 |
| 0.0211109356327019 | 0.7500000000000000 | 0.1654249923633647 |
| 0.5211109356327019 | 0.7500000000000000 | 0.3345750076366352 |
| 0.9788890643672981 | 0.2500000000000000 | 0.8345750076366353 |
| 0.8577458222096654 | 0.2500000000000000 | 0.4287157560993083 |
| 0.6422541777903346 | 0.7500000000000000 | 0.9287157560993083 |
| 0.1422541777903346 | 0.7500000000000000 | 0.5712842439006917 |
| 0.3577458222096654 | 0.2500000000000000 | 0.0712842439006917 |
| 0.2456112005986677 | 0.2500000000000000 | 0.3906139244534804 |
| 0.2543887994013323 | 0.7500000000000000 | 0.8906139244534804 |
| 0.7543887994013323 | 0.7500000000000000 | 0.6093860755465196 |
| 0.7456112005986677 | 0.2500000000000000 | 0.1093860755465196 |

### **P6<sub>3</sub>/mmc- Li<sub>2</sub>S**

1.0000000000000000

|                     |                    |                     |
|---------------------|--------------------|---------------------|
| 3.9406696216941870  | 0.0000000000000000 | -0.0000000000000000 |
| -1.9703348108470935 | 3.4127202154041267 | 0.0000000000000000  |
| 0.0000000000000000  | 0.0000000000000000 | 7.0860516454135549  |

Li S

4 2

Direct

|                    |                    |                    |
|--------------------|--------------------|--------------------|
| 0.3333330000000032 | 0.6666669999999968 | 0.5917880376474784 |
| 0.3333330000000032 | 0.6666669999999968 | 0.9082119623525216 |
| 0.6666669999999968 | 0.3333330000000032 | 0.4082119623525215 |
| 0.6666669999999968 | 0.3333330000000032 | 0.0917880376474785 |
| 0.3333330000000032 | 0.6666669999999968 | 0.2500000000000000 |
| 0.6666669999999968 | 0.3333330000000032 | 0.7500000000000000 |

### **P6<sub>3</sub>mc**

1.0000000000000000

|                     |                     |                     |
|---------------------|---------------------|---------------------|
| 3.9778925499822688  | -0.0000000000000653 | -0.0000000000000000 |
| -1.9889462749412476 | 3.4449560018069096  | 0.0000000000000000  |
| 0.0000000000000000  | 0.0000000000000000  | 6.7912492953888508  |

Li S

4 2

Direct

|                    |                     |                    |
|--------------------|---------------------|--------------------|
| 0.0000000000000000 | -0.0000000000000000 | 0.2077051418209083 |
| 0.0000000000000000 | 0.0000000000000000  | 0.7077051568209060 |
| 0.3333333429999996 | 0.6666666870000029  | 0.9469165615453281 |
| 0.6666666269999979 | 0.3333333129999971  | 0.4469165615453281 |
| 0.3333333429999996 | 0.6666666870000029  | 0.3177382966337584 |
| 0.6666666269999979 | 0.3333333129999971  | 0.8177382966337584 |

### S3. Atomic Coordinates of $(\text{Li}_2\text{S})_n$ ( $n=1-12$ ) clusters

#### $n=1$ : $\text{Li}_2\text{S}$

```
1.0000000000000000
15.0000000000000000  0.0000000000000000  0.0000000000000000
 0.0000000000000000  15.0000000000000000  0.0000000000000000
0.0000000000000000  0.0000000000000000  15.0000000000000000

  Li  S
    2   1

  Direct

0.56335700000000034  0.55061200000000010  0.54419000000000004
0.44143700000000005  0.39560900000000003  0.40349799999999990
0.49166799999999971  0.52266999999999980  0.42853900000000007
```

#### $n=2$ : $(\text{Li}_2\text{S})_2$

```
1.0000000000000000
 15.0000000000000000  0.0000000000000000  0.0000000000000000
 0.0000000000000000  15.0000000000000000  0.0000000000000000
 0.0000000000000000  0.0000000000000000  15.0000000000000000

  Li  S
    4   2

  Direct

0.53209999999999998  0.43454100000000030  0.53022500000000015
0.51884700000000009  0.60212500000000009  0.54350300000000012
0.37974400000000023  0.50604400000000028  0.54582599999999981
0.46775800000000034  0.53235699999999975  0.27548699999999983
0.48448799999999989  0.50600699999999968  0.65214900000000014
0.46856600000000027  0.52308099999999977  0.41658400000000003
```

#### $n=3$ : $(\text{Li}_2\text{S})_3$

```
1.0000000000000000
```

|                     |                     |                     |
|---------------------|---------------------|---------------------|
| 15.0000000000000000 | 0.0000000000000000  | 0.0000000000000000  |
| 0.0000000000000000  | 15.0000000000000000 | 0.0000000000000000  |
| 0.0000000000000000  | 0.0000000000000000  | 15.0000000000000000 |

Li S

6 3

Direct

|                    |                    |                    |
|--------------------|--------------------|--------------------|
| 0.4641980000000032 | 0.5151189999999986 | 0.4227089999999976 |
| 0.4578950000000006 | 0.5205229999999972 | 0.5817010000000025 |
| 0.6965300000000028 | 0.3401879999999977 | 0.5307299999999984 |
| 0.4422199999999989 | 0.3579379999999972 | 0.5067960000000014 |
| 0.6110040000000012 | 0.5753070000000022 | 0.5062259999999981 |
| 0.3419600000000003 | 0.6102679999999978 | 0.4939910000000012 |
| 0.3365670000000023 | 0.4592150000000004 | 0.4988939999999999 |
| 0.4870949999999965 | 0.6527870000000036 | 0.4985879999999980 |
| 0.5830819999999974 | 0.4231320000000025 | 0.5117710000000031 |

**n=4:(Li<sub>2</sub>S)<sub>4</sub>**

1.0000000000000000

|                     |                     |                     |
|---------------------|---------------------|---------------------|
| 15.0000000000000000 | 0.0000000000000000  | 0.0000000000000000  |
| 0.0000000000000000  | 15.0000000000000000 | 0.0000000000000000  |
| 0.0000000000000000  | 0.0000000000000000  | 15.0000000000000000 |

Li S

8 4

Direct

|                    |                    |                    |
|--------------------|--------------------|--------------------|
| 0.4894219999999976 | 0.5098550000000017 | 0.5091589999999968 |
| 0.5555719999999980 | 0.4648480000000035 | 0.6644649999999999 |
| 0.4431179999999983 | 0.6391640000000010 | 0.5947919999999982 |
| 0.6322339999999969 | 0.4613670000000027 | 0.5066720000000018 |
| 0.6052940000000007 | 0.6250720000000030 | 0.4481019999999987 |
| 0.3675100000000029 | 0.4177930000000032 | 0.5628659999999996 |

|                    |                    |                    |
|--------------------|--------------------|--------------------|
| 0.517099999999992  | 0.368318999999996  | 0.4116020000000020 |
| 0.4111639999999994 | 0.5552089999999978 | 0.3748549999999966 |
| 0.5598760000000027 | 0.5063869999999966 | 0.3635670000000033 |
| 0.5127590000000026 | 0.3591290000000029 | 0.5634780000000035 |
| 0.3431950000000015 | 0.5592850000000027 | 0.5113429999999966 |
| 0.5938179999999988 | 0.5960329999999985 | 0.5971529999999987 |

**n=5:(Li<sub>2</sub>S)<sub>5</sub>**

1.000000000000000

|                    |                    |                    |
|--------------------|--------------------|--------------------|
| 15.000000000000000 | 0.000000000000000  | 0.000000000000000  |
| 0.000000000000000  | 15.000000000000000 | 0.000000000000000  |
| 0.000000000000000  | 0.000000000000000  | 15.000000000000000 |

Li S

10 5

Direct

|                    |                    |                    |
|--------------------|--------------------|--------------------|
| 0.5148530000000022 | 0.4733450000000019 | 0.4636390000000006 |
| 0.3098659999999995 | 0.5142349999999993 | 0.6149610000000010 |
| 0.3879179999999991 | 0.5787779999999998 | 0.4792890000000014 |
| 0.4814259999999990 | 0.3738090000000014 | 0.5960419999999971 |
| 0.4670020000000008 | 0.7211759999999998 | 0.5271329999999992 |
| 0.6436410000000024 | 0.5739769999999993 | 0.5047899999999998 |
| 0.4271260000000012 | 0.3525210000000030 | 0.3842050000000015 |
| 0.5619399999999999 | 0.5296659999999989 | 0.3100340000000017 |
| 0.5034429999999972 | 0.5613389999999967 | 0.6345170000000024 |
| 0.6497469999999979 | 0.3697080000000028 | 0.4711550000000031 |
| 0.5699850000000026 | 0.3827119999999979 | 0.3447529999999972 |
| 0.3778470000000027 | 0.6475739999999988 | 0.6228029999999976 |
| 0.6124780000000030 | 0.4541210000000007 | 0.5962079999999972 |
| 0.5306780000000018 | 0.6318259999999967 | 0.4203100000000006 |
| 0.3656799999999976 | 0.4196120000000008 | 0.5080549999999988 |



**n=6:(Li<sub>2</sub>S)<sub>6</sub>**

1.0000000000000000

|                     |                     |                     |
|---------------------|---------------------|---------------------|
| 15.0000000000000000 | 0.0000000000000000  | 0.0000000000000000  |
| 0.0000000000000000  | 15.0000000000000000 | 0.0000000000000000  |
| 0.0000000000000000  | 0.0000000000000000  | 15.0000000000000000 |

Li S

12 6

Direct

|                    |                    |                    |
|--------------------|--------------------|--------------------|
| 0.4941400893198049 | 0.5273393823730120 | 0.5849924663038997 |
| 0.3622051027878528 | 0.4529219664325890 | 0.4756472233611097 |
| 0.3725819073074836 | 0.6385960444150842 | 0.6313071930455940 |
| 0.5054158135313046 | 0.5116453522740146 | 0.4043805337433520 |
| 0.6126614467614282 | 0.4151135309889024 | 0.5202458391566956 |
| 0.6010189546008630 | 0.5889503156515921 | 0.7014589402171829 |
| 0.5210790059842162 | 0.4233056363179278 | 0.2525354793942977 |
| 0.3481541347351582 | 0.5791737547672775 | 0.3451197408549264 |
| 0.7041395644611502 | 0.5279607014184229 | 0.4229200094091841 |
| 0.4371206519560173 | 0.4234607841495537 | 0.7013490415137486 |
| 0.5462806071021206 | 0.6730889669356087 | 0.5098642529834108 |
| 0.4871272230137266 | 0.3428806963623636 | 0.4080100371891879 |
| 0.6511550064281754 | 0.5738680041182501 | 0.5570422141556969 |
| 0.4556096728082559 | 0.5700558413650202 | 0.7348361322745123 |
| 0.6273400280152738 | 0.4156724845823902 | 0.3599260093822162 |
| 0.4044374906895519 | 0.6232718625882628 | 0.4804176480863876 |
| 0.3859974592361283 | 0.4366369196790688 | 0.3195163109335528 |
| 0.4663008412614963 | 0.3732147555806620 | 0.5597039279950389 |

**n=7:(Li<sub>2</sub>S)<sub>7</sub>**

1.0000000000000000

|                    |                    |                    |
|--------------------|--------------------|--------------------|
| 15.000000000000000 | 0.000000000000000  | 0.000000000000000  |
| 0.000000000000000  | 15.000000000000000 | 0.000000000000000  |
| 0.000000000000000  | 0.000000000000000  | 15.000000000000000 |
| Li                 | S                  |                    |
| 14                 | 7                  |                    |
| Direct             |                    |                    |
| 0.623838999999967  | 0.514310000000018  | 0.3531570000000031 |
| 0.5109720000000024 | 0.3628140000000002 | 0.4522440000000003 |
| 0.526688999999975  | 0.637594999999975  | 0.687986999999997  |
| 0.725394999999989  | 0.415368999999983  | 0.4963460000000026 |
| 0.4338580000000007 | 0.538522999999979  | 0.4465450000000004 |
| 0.6376240000000024 | 0.3874380000000031 | 0.7049710000000005 |
| 0.3421900000000022 | 0.6894070000000028 | 0.4546479999999988 |
| 0.412388999999975  | 0.525576999999984  | 0.6257900000000021 |
| 0.5963100000000026 | 0.6666700000000034 | 0.4911549999999991 |
| 0.480604999999971  | 0.3656530000000018 | 0.6324650000000034 |
| 0.2559070000000006 | 0.502448999999986  | 0.493758999999972  |
| 0.3981410000000025 | 0.5539830000000023 | 0.267181999999983  |
| 0.350687999999981  | 0.422601999999977  | 0.372903999999983  |
| 0.5971990000000034 | 0.495353999999990  | 0.574911999999976  |
| 0.6201730000000012 | 0.330978999999992  | 0.564256999999978  |
| 0.494393999999998  | 0.449278999999971  | 0.3176750000000013 |
| 0.7008310000000009 | 0.5627300000000020 | 0.472929999999981  |
| 0.5298280000000020 | 0.492230999999968  | 0.724559999999968  |
| 0.2871790000000018 | 0.5782420000000030 | 0.3673620000000000 |
| 0.3678200000000018 | 0.407578999999984  | 0.5312520000000021 |
| 0.4560370000000020 | 0.664068999999978  | 0.552821999999990  |

**n=8:(Li<sub>2</sub>S)<sub>8</sub>**

1.000000000000000

|                     |                     |                     |
|---------------------|---------------------|---------------------|
| 15.0000000000000000 | 0.0000000000000000  | 0.0000000000000000  |
| 0.0000000000000000  | 15.0000000000000000 | 0.0000000000000000  |
| 0.0000000000000000  | 0.0000000000000000  | 15.0000000000000000 |
| Li                  | S                   |                     |
| 16                  | 8                   |                     |
| Direct              |                     |                     |
| 0.4525035659637136  | 0.4370660523545238  | 0.5226988164031496  |
| 0.4179093927394607  | 0.4063381152883628  | 0.3582903041960486  |
| 0.5658345601835707  | 0.3256785863837972  | 0.4636620532776243  |
| 0.5086898360750278  | 0.4906280404653927  | 0.6775261747443040  |
| 0.5483790363186722  | 0.5211344518037376  | 0.3588496433867027  |
| 0.6766192429188043  | 0.4936947280546637  | 0.5453282258715569  |
| 0.2935191484860875  | 0.3523759482364133  | 0.5440931872574872  |
| 0.3636744341300374  | 0.5625279219713885  | 0.7402152036013366  |
| 0.5337636688850708  | 0.6323075119657720  | 0.5074242260205991  |
| 0.4808016565589587  | 0.2452636271342886  | 0.3374568762285707  |
| 0.3655108808100861  | 0.5728353532225453  | 0.5678610439379657  |
| 0.6528622768726396  | 0.7245917429429602  | 0.4099686733068746  |
| 0.4556703709901616  | 0.3116406908821074  | 0.6219816680903539  |
| 0.4232876225007114  | 0.7010690683911432  | 0.3899065460991711  |
| 0.6956557070989557  | 0.4451138962858873  | 0.3412832690132913  |
| 0.4909179880949530  | 0.7766871061413529  | 0.5986610214584976  |
| 0.5683753193797898  | 0.3670225313972573  | 0.3098231547605181  |
| 0.5911577401017412  | 0.3858850966079773  | 0.6022467470871290  |
| 0.4071680770704674  | 0.5509149959668530  | 0.4188182243113214  |
| 0.3500865457041130  | 0.4350106567098597  | 0.6573412246685711  |
| 0.5253622127989793  | 0.7885615971060728  | 0.4540200415121683  |
| 0.4036665601151816  | 0.2847768328112548  | 0.4644163674218295  |
| 0.4685887292868574  | 0.6425487351923974  | 0.6662005360000466  |
| 0.6824664269159748  | 0.5761927126839834  | 0.4195627713448800  |

**n=9:(Li<sub>2</sub>S)<sub>9</sub>**

1.0000000000000000

|                     |                     |                     |
|---------------------|---------------------|---------------------|
| 15.0000000000000000 | 0.0000000000000000  | 0.0000000000000000  |
| 0.0000000000000000  | 15.0000000000000000 | 0.0000000000000000  |
| 0.0000000000000000  | 0.0000000000000000  | 15.0000000000000000 |

Li S

18 9

Direct

|                    |                    |                    |
|--------------------|--------------------|--------------------|
| 0.4547725966013443 | 0.3512331720926729 | 0.4886591165713999 |
| 0.6163074282013261 | 0.6755024356640440 | 0.5414314794081397 |
| 0.3563868654499842 | 0.7534792804281959 | 0.5521211932512189 |
| 0.7444185751565721 | 0.5915812266997779 | 0.4048006301918118 |
| 0.4678808744165010 | 0.5940303335755962 | 0.3429018685219396 |
| 0.4022900049045260 | 0.3059445103737803 | 0.3282708436814924 |
| 0.5160574833157989 | 0.4158054776336664 | 0.6383179536936503 |
| 0.6204482005238897 | 0.3404540066402106 | 0.4128436217885910 |
| 0.4557106850836793 | 0.5914381196884344 | 0.5732299082781697 |
| 0.4890594400409446 | 0.7339653267787111 | 0.4482705770208538 |
| 0.4852321317349793 | 0.1892550170537868 | 0.5215166398373968 |
| 0.6950798797236212 | 0.4114476171435078 | 0.5613223151936590 |
| 0.2733495670836269 | 0.5674874493351966 | 0.5477521284775727 |
| 0.2964419196236392 | 0.3169389871940492 | 0.5497086269380604 |
| 0.3700604773082763 | 0.4896092011705832 | 0.4346698482015380 |
| 0.6276903357042694 | 0.5006388595620694 | 0.3086914135217719 |
| 0.5951346446593403 | 0.5115010767401211 | 0.4663585230434604 |
| 0.5585697472873530 | 0.6584344230068114 | 0.7049904128743463 |
| 0.6108831716854962 | 0.5411619387437065 | 0.6240318517351828 |
| 0.4940159861876589 | 0.7540281268560571 | 0.6073026921014177 |
| 0.3581778174894160 | 0.2279159701032419 | 0.4472135345320408 |

|                    |                    |                    |
|--------------------|--------------------|--------------------|
| 0.6071366213860973 | 0.6558735205428151 | 0.3819646312412217 |
| 0.5842473370039719 | 0.2977788507034757 | 0.5593780254385071 |
| 0.4869481363086323 | 0.4349397069658194 | 0.3459430061363112 |
| 0.3468078605517966 | 0.6484492192854361 | 0.4397232587310998 |
| 0.3599085164000247 | 0.4516187804325257 | 0.5893907055676143 |
| 0.7340766961672477 | 0.4436413655857099 | 0.4077171940215236 |

**n=10:(Li<sub>2</sub>S)<sub>10</sub>**

1.0000000000000000

|                     |                     |                     |
|---------------------|---------------------|---------------------|
| 15.0000000000000000 | 0.0000000000000000  | 0.0000000000000000  |
| 0.0000000000000000  | 15.0000000000000000 | 0.0000000000000000  |
| 0.0000000000000000  | 0.0000000000000000  | 15.0000000000000000 |

Li S

20 10

Direct

|                    |                    |                    |
|--------------------|--------------------|--------------------|
| 0.5093015421443750 | 0.6875107552265634 | 0.3566363208884820 |
| 0.5285762550765726 | 0.5618945466561360 | 0.4792902404430869 |
| 0.3410499026897412 | 0.6262173737208246 | 0.5654879666122142 |
| 0.4099011344186128 | 0.3775802511650332 | 0.7050012442772710 |
| 0.5761978424555526 | 0.6270339567482653 | 0.2183352548680020 |
| 0.2376605131203772 | 0.3802338637066331 | 0.4810676457352914 |
| 0.6823620372791043 | 0.2792995897471188 | 0.5948170091245252 |
| 0.3449145596538142 | 0.6489079585230560 | 0.3883327302702860 |
| 0.5961848916335680 | 0.4214841320017638 | 0.5479167683020170 |
| 0.7307768169328035 | 0.5384281066679265 | 0.4821778410892026 |
| 0.6542243709428932 | 0.4008422253944091 | 0.3918820159812601 |
| 0.2644893465854430 | 0.4708173196315560 | 0.6324667362713760 |
| 0.3669006903491292 | 0.4843141524746982 | 0.3520359345553093 |
| 0.4583558913221264 | 0.2967564533978438 | 0.5539204337843896 |
| 0.6184976358977207 | 0.6927758241888118 | 0.4977949618832925 |

|                    |                    |                    |
|--------------------|--------------------|--------------------|
| 0.4978788358877607 | 0.6508743667954695 | 0.6368566312085150 |
| 0.5422342212460639 | 0.4926287663103165 | 0.7005225660580967 |
| 0.5297417812656858 | 0.5065888140451150 | 0.3176609835682068 |
| 0.3890344875222193 | 0.4536462295369807 | 0.5373569114085615 |
| 0.7168295908702917 | 0.4493349891045070 | 0.6468016647942643 |
| 0.3111975995983139 | 0.3231843119181833 | 0.5983950905155695 |
| 0.6489055061493667 | 0.6021109282165901 | 0.3572525122894562 |
| 0.5678886441981318 | 0.3388314737895678 | 0.6763423950408723 |
| 0.4967855600727926 | 0.4049975692355633 | 0.4267787146020515 |
| 0.2647559578608683 | 0.5306695543393135 | 0.4646651024183835 |
| 0.6391038180587308 | 0.5807719071621783 | 0.6089924218126697 |
| 0.4272819258026432 | 0.6014265793617057 | 0.2561764556061343 |
| 0.7506107340173586 | 0.3836961414073836 | 0.5080744807685268 |
| 0.4569901980206603 | 0.7100358458526015 | 0.4964145333307039 |
| 0.3953467089272770 | 0.5407320136738911 | 0.6861204324919793 |

**n=11:(Li<sub>2</sub>S)<sub>11</sub>**

1.0000000000000000

|                     |                     |                     |
|---------------------|---------------------|---------------------|
| 15.0000000000000000 | 0.0000000000000000  | 0.0000000000000000  |
| 0.0000000000000000  | 15.0000000000000000 | 0.0000000000000000  |
| 0.0000000000000000  | 0.0000000000000000  | 15.0000000000000000 |

Li S

22 11

Direct

|                    |                    |                    |
|--------------------|--------------------|--------------------|
| 0.5445186549561026 | 0.4764626303547709 | 0.3793506976553024 |
| 0.6580254244033472 | 0.4083934007975843 | 0.6869193084099806 |
| 0.4818569300962930 | 0.3679441183045691 | 0.2760002322987346 |
| 0.6352355682939779 | 0.6601923481061976 | 0.5981207637034047 |
| 0.2091723454805319 | 0.4494785424668119 | 0.5587899910966566 |
| 0.3509320356805306 | 0.6369759872594154 | 0.3592323893012017 |

|                    |                    |                    |
|--------------------|--------------------|--------------------|
| 0.5522705572043314 | 0.5743928156705660 | 0.7317774789402718 |
| 0.7057220482986333 | 0.4515590547070501 | 0.3941617447975160 |
| 0.4926241653320093 | 0.8019236561258182 | 0.5390905224473310 |
| 0.5737176028408916 | 0.5023935349599998 | 0.2052810191092508 |
| 0.3253947045141082 | 0.2548042027647199 | 0.4910896961283531 |
| 0.3776806787768727 | 0.4080715397672814 | 0.5530767729480233 |
| 0.4828226809115921 | 0.6306534984831770 | 0.4950719641033794 |
| 0.3641320561548019 | 0.4597289031170547 | 0.3854721419743321 |
| 0.3595840756896020 | 0.3420256432224819 | 0.7124369577330252 |
| 0.7495179689441657 | 0.5082326812377080 | 0.5610210777351013 |
| 0.6110948941389063 | 0.3032834000723302 | 0.4009204298149415 |
| 0.3957920134627032 | 0.5583715258810916 | 0.6407771991377097 |
| 0.5904360824838062 | 0.4952925810257970 | 0.5704706333135035 |
| 0.3455257425715679 | 0.7044880869319333 | 0.5365968168790595 |
| 0.5356307455622573 | 0.3300233066245455 | 0.5614362800871133 |
| 0.5296799712705114 | 0.6642489642291723 | 0.3395822895316764 |
| 0.6980284277455754 | 0.5570437393056974 | 0.6930037321212565 |
| 0.4781588508427843 | 0.6906307824155961 | 0.6441209597644166 |
| 0.4399995113743337 | 0.5366853450188572 | 0.2726534346726951 |
| 0.6315590277122473 | 0.5915897291188964 | 0.4482191860450562 |
| 0.6840617661787111 | 0.3638502209388392 | 0.5310860577688578 |
| 0.6362971804125185 | 0.3852391664389104 | 0.2729800098432539 |
| 0.4259222047037386 | 0.7593583850226150 | 0.4124027672892023 |
| 0.3117632619620856 | 0.5520661755935444 | 0.5033227901251391 |
| 0.2560301843911802 | 0.3165451825364156 | 0.6080849191267403 |
| 0.4829841961863182 | 0.4285300874627426 | 0.6782187957142571 |
| 0.4459294414229596 | 0.3276547640378151 | 0.4271269403832600 |

**n=12:(Li<sub>2</sub>S)<sub>12</sub>**

1.0000000000000000

|                     |                     |                     |
|---------------------|---------------------|---------------------|
| 15.0000000000000000 | 0.0000000000000000  | 0.0000000000000000  |
| 0.0000000000000000  | 15.0000000000000000 | 0.0000000000000000  |
| 0.0000000000000000  | 0.0000000000000000  | 15.0000000000000000 |

Li S

24 12

Direct

|                    |                    |                    |
|--------------------|--------------------|--------------------|
| 0.6043392649359747 | 0.4415088360441095 | 0.4358706793111218 |
| 0.3238130084762043 | 0.6367372172080199 | 0.4215987864130465 |
| 0.4638084682249446 | 0.4768671462246051 | 0.2593267001252056 |
| 0.2760770934629504 | 0.3427293991184505 | 0.4416417622412492 |
| 0.5421195624681577 | 0.5218385006483878 | 0.7171555898941301 |
| 0.7065240009063821 | 0.6375917343419628 | 0.5221539687849360 |
| 0.7225749041857940 | 0.3763655174155675 | 0.3655679545179605 |
| 0.6848986717124128 | 0.5058406936171478 | 0.6302788586368250 |
| 0.5280995854299105 | 0.6189476842393271 | 0.5104826235999009 |
| 0.3129610773843117 | 0.6037761398289485 | 0.5881409138916327 |
| 0.5355830250615169 | 0.2870577476518423 | 0.5781189245156213 |
| 0.4489848166118296 | 0.2607431427419000 | 0.4316329740392661 |
| 0.4459332451654121 | 0.3815617910336367 | 0.6855090616818053 |
| 0.3067373137782582 | 0.4933109189316476 | 0.3274270163605106 |
| 0.3349854474942686 | 0.5382335274153626 | 0.8559068707879982 |
| 0.5571367408984169 | 0.6140304848013730 | 0.2886075280911127 |
| 0.4661408641458276 | 0.7269558474379526 | 0.3831273488480942 |
| 0.5652683275510123 | 0.7644753557709769 | 0.5436234234237447 |
| 0.2922337960187621 | 0.4287773445859906 | 0.6102397442263576 |
| 0.4573773559061355 | 0.6695230341590200 | 0.6686957078252205 |
| 0.6951427070379047 | 0.3500316739136502 | 0.5553504655005418 |
| 0.5458869506847479 | 0.3328046617365013 | 0.3054528978924098 |
| 0.7069733697991122 | 0.5682124900526775 | 0.3622277094374597 |
| 0.4000902338617999 | 0.4307949984764659 | 0.4650741142623325 |



|                    |                    |                    |
|--------------------|--------------------|--------------------|
| 0.6101580929525164 | 0.6464729478485955 | 0.6492089523483435 |
| 0.2565110998308734 | 0.5038893556802067 | 0.4793461030897504 |
| 0.4042341691394334 | 0.7201195698296283 | 0.5319355263121691 |
| 0.3763176087018529 | 0.3048965703338890 | 0.5666897499469642 |
| 0.6012336525992490 | 0.3839107690980211 | 0.6808083605700334 |
| 0.3771303938532056 | 0.5288412237605840 | 0.7179247925513030 |
| 0.6097243779082413 | 0.2797438214041867 | 0.4390767264774813 |
| 0.6212098368516087 | 0.4681132718116704 | 0.2754771079212365 |
| 0.4000789750686946 | 0.6162496402485776 | 0.2886688125739392 |
| 0.6219971340461470 | 0.6994686771313735 | 0.4054499086197427 |
| 0.7502381259156671 | 0.4848130778632853 | 0.4885365808275916 |
| 0.3853437019304526 | 0.3542141875944699 | 0.3215177544529524 |
